# Supplementary material for: Photoluminescence of Sn2+–I−-mixed molecular perovskites
Source: Royal Society of Chemistry journal article supplement (doi:10.1039/c8tc02587h), 2018-01-01
Supplement: c8tc02587h1.pdf [file c8tc02587h1.pdf]

## Supporting Information

### Photoluminescence of $\text{Sn}^{2+}\text{-I}^-$ -mixed molecular perovskites

Guang-Meng Fan,<sup>a</sup> Chao Shi,<sup>\*a,b</sup> Liang Qiao,<sup>a</sup> Hao-Jie Li<sup>a</sup> and Heng-Yun Ye<sup>b</sup>

<sup>a</sup> Ordered Matter Science Research Center, Jiangsu Key Laboratory for Science and Applications of Molecular Ferroelectrics, Southeast University, Nanjing 211189, Jiangsu, China

<sup>b</sup> Chaotic Matter Science Research Center, Jiangxi University of Science and Technology, Nanchang 330013, Jiangxi, China

### Experimental section

**Synthesis of starting materials.** MDABCO (MDABCO = N-methyl-N'-diazabicyclo(2,2,2)octonium) slats. MDABCO slats were prepared by evaporation of a solution containing stoichiometric MDABCO iodide and the  $\text{HBF}_4$  or  $\text{HReO}_4$  in air. The materials were heating at around 333 K for one day to remove yellow  $\text{I}_2$  impurities. The Mdabco iodide was prepared by reaction of dabco and  $\text{CH}_3\text{I}$  in toluene.

**Crystal growth.** MDABCO( $\text{NH}_4$ )( $\text{BF}_4$ )<sub>3</sub> (**I**) or MDABCO( $\text{NH}_4$ )( $\text{ReO}_4$ )<sub>3</sub> (**II**) was obtained as crystal by evaporation of a solution containing stoichiometric MDABCO( $\text{BF}_4$ )<sub>2</sub> or MDABCO( $\text{ReO}_4$ )<sub>2</sub> and  $\text{NH}_4\text{BF}_4$  or  $\text{NH}_4\text{ReO}_4$  at around 333 K. The purity of the bulk phases was verified by PXRD (Fig. S1).

**Mixing of  $\text{Sn}^{2+}$ .** The crystals of  $\text{Sn}^{2+}$ -mixed compound were grown as the same method as that for non-mixed compound, except that  $\text{SnCl}_2$  and  $\text{H}_3\text{PO}_2$  were used. The used volume amounts of  $\text{H}_3\text{PO}_2$  solution (50%) is about one sixth of the whole. The use of  $\text{H}_3\text{PO}_2$  is to avoid of the oxidation of  $\text{Sn}^{2+}$ . To avoid contamination of the impurities, the crystals were separated before the drying of the solution in the evaporation.

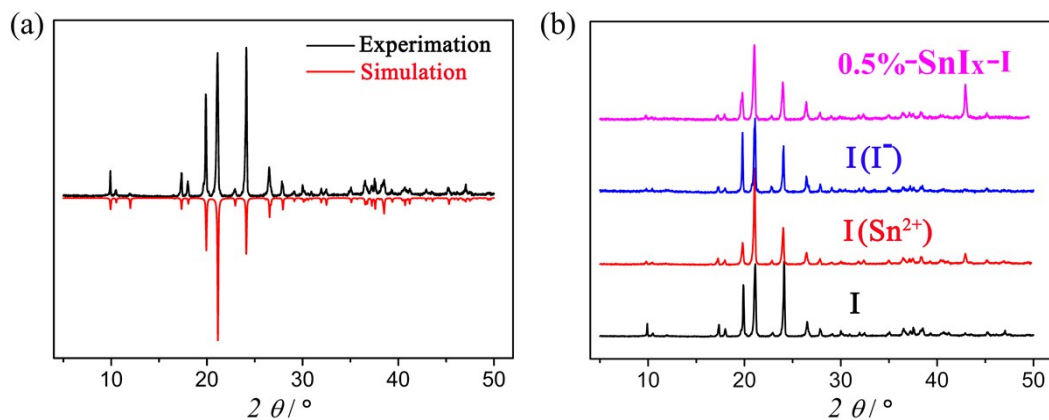

**Figure S1.** Powder X-ray diffraction pattern of (a) **I** and (b) mixing of  $\text{SnI}_x$ -**I** measured at room temperature, verifying the purity of the bulk.

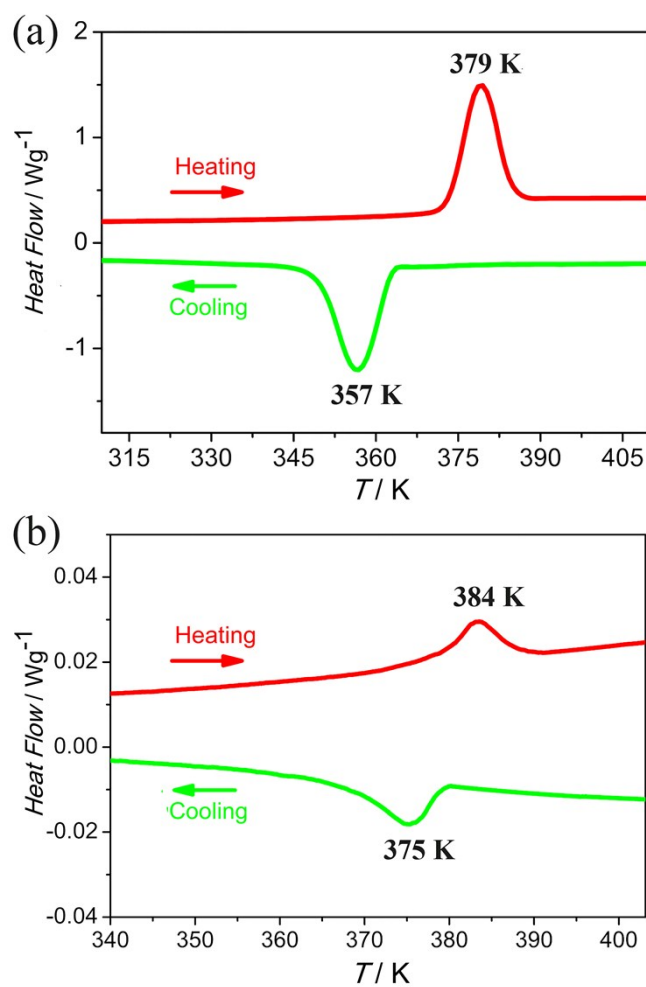

**Figure S2.** DSC curves of (a) **I** and (b) **II** measured in the heating-cooling cycle.

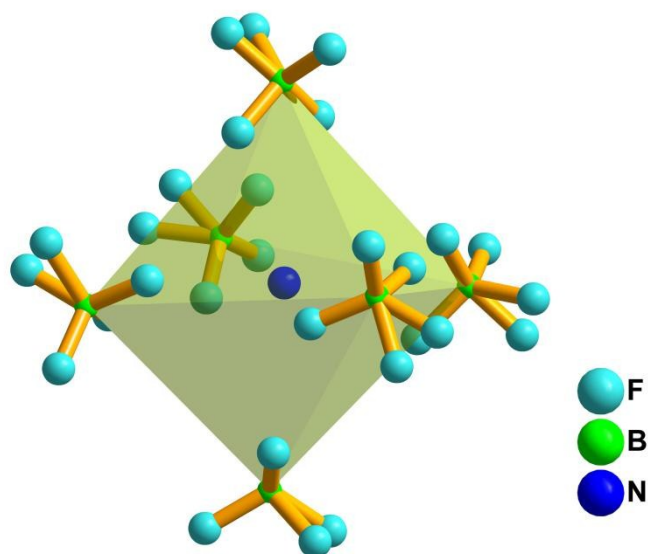

**Figure S3.** The structure of the  $\text{NH}_4(\text{BF}_4)_6$  octahedron in  $(\text{MDABCO})(\text{NH}_4)(\text{BF}_4)_3$  (**I**), showing the tilting geometry from that of the regular one.

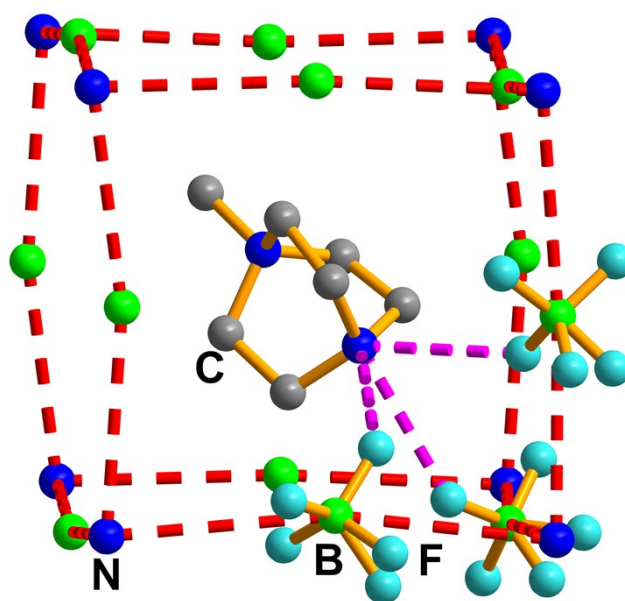

**Figure S4.** The cage-like structure of  $(\text{MDABCO})(\text{NH}_4)(\text{BF}_4)_3$  (**I**), showing the hydrogen bond interactions between the A-site organic cation the X-site  $\text{BF}_4^-$  anion. The pink dashed lines indicate the hydrogen bonds. Hydrogen atoms and partial fluorine atoms are omitted for clarity.

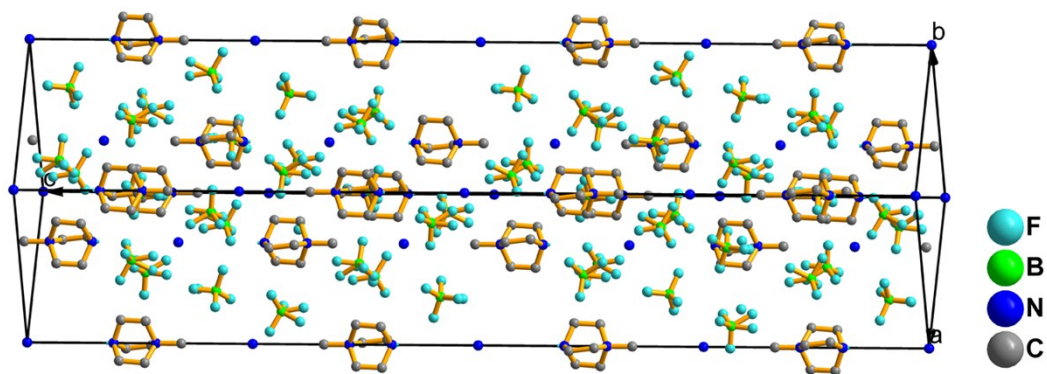

**Figure S5.** The packing view of (MDABCO)(NH<sub>4</sub>)(BF<sub>4</sub>)<sub>3</sub> (**I**), showing centrosymmetric structure with the head-to-head and tail-to-tail arrangement of the organic cation.

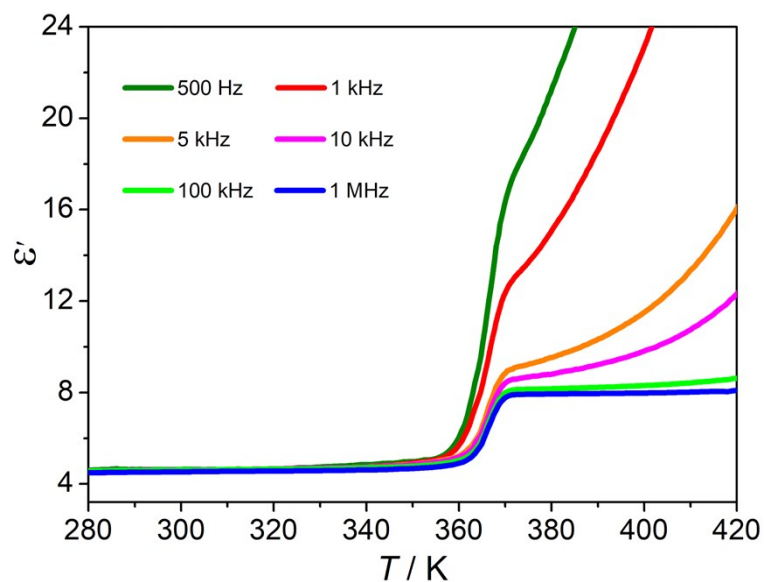

**Figure S6.** The real part of complex dielectric permittivity ( $\epsilon'$ ) of **I** as a function of temperature at the frequency range from 500 Hz to 1 MHz.

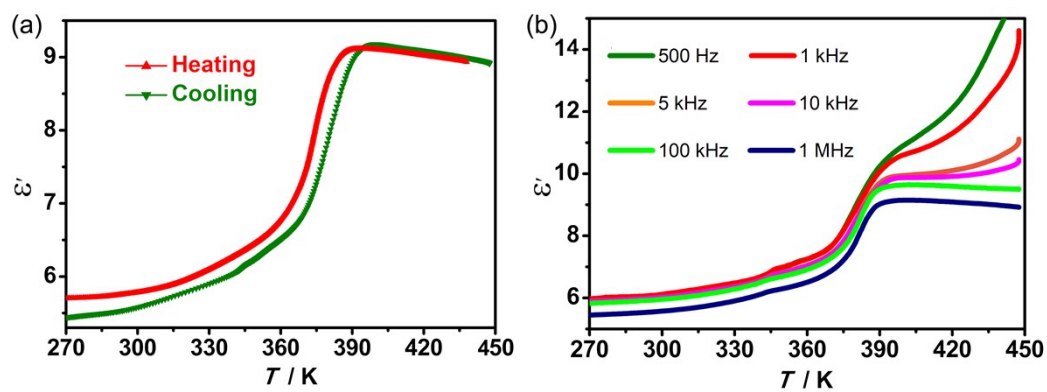

**Figure S7.** The real part of complex dielectric permittivity ( $\epsilon'$ ) of **II** as a function of temperature at (a) 1 MHz and (b) at the frequency range from 500 Hz to 1 MHz.

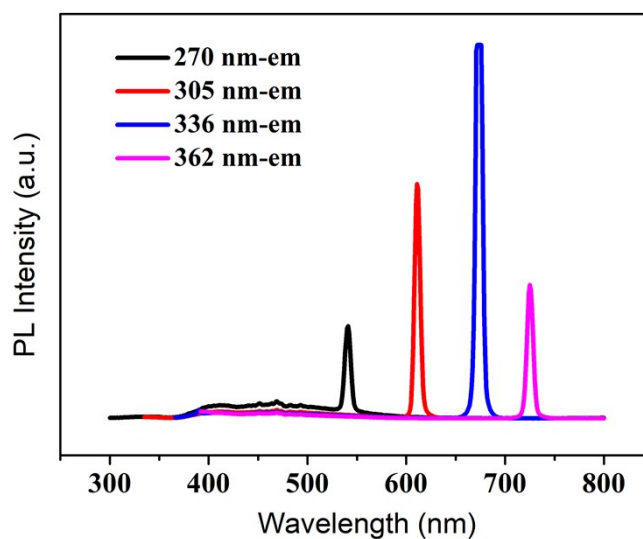

**Figure S8.** Emission spectra of **I**, confirming that **I** do not emit light under UV excitation.

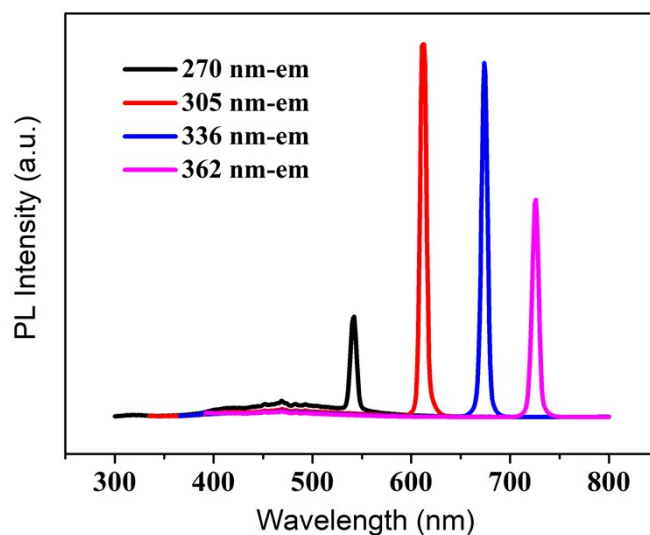

**Figure S9.** Emission spectra of  $\mathbf{I}(\text{I}^-)$ , confirming that  $\mathbf{I}(\text{I}^-)$  do not emit light under UV excitation.

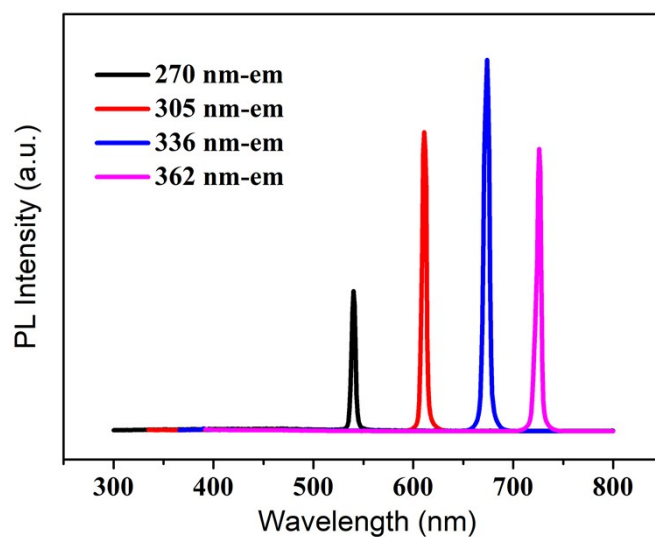

**Figure S10.** Emission spectra of  $\mathbf{I}(\text{Sn}^{2+})$ , confirming that  $\mathbf{I}(\text{Sn}^{2+})$  do not emit light under UV excitation.

**Table S1.** Crystal data and structure refinements for  $\mathbf{I}$ .

|                | 293 K                                                      | 408 K                                                      |
|----------------|------------------------------------------------------------|------------------------------------------------------------|
| Formula        | $\text{C}_7\text{H}_{20}\text{B}_3\text{F}_{12}\text{N}_3$ | $\text{C}_7\text{H}_{20}\text{B}_3\text{F}_{12}\text{N}_3$ |
| $M_w$          | 406.69                                                     | 406.69                                                     |
| Crystal system | Trigonal                                                   | cubic                                                      |
| Space group    | $R\bar{3}c$                                                | $Pm\bar{3}m$                                               |

|                                                               |                |                |
|---------------------------------------------------------------|----------------|----------------|
| $a$ [Å]                                                       | 10.213(2)      | 7.4699(6)      |
| $b$ [Å]                                                       | 10.213(2)      | 7.4699(6)      |
| $c$ [Å]                                                       | 53.387(9)      | 7.4699(6)      |
| $\alpha$ [°]                                                  | 90             | 90             |
| $\beta$ [°]                                                   | 90             | 90             |
| $\gamma$ [°]                                                  | 120            | 90             |
| $V$ [Å <sup>3</sup> ]                                         | 4823(2)        | 416.82(10)     |
| $Z$                                                           | 12             | 1              |
| $D_{\text{calc}} / \text{g} \cdot \text{cm}^{-3}$             | 1.680          | 1.620          |
| $\mu$ [mm <sup>-1</sup> ]                                     | 0.196          | 0.189          |
| Reflections collected unique                                  | 6151 / 1216    | 666 / 144      |
| $R_{\text{int}}$                                              | 0.0572         | 0.0453         |
| $R_1^{\text{[a]}}$ , $wR_2^{\text{[b]}}$ ( $I > 2\sigma(I)$ ) | 0.1254, 0.3255 | 0.2214, 0.6111 |
| $R_1^{\text{[a]}}$ , $wR_2^{\text{[b]}}$ (all data)           | 0.1470, 0.3425 | 0.2710, 0.6333 |
| GOF                                                           | 1.129          | 2.454          |
| $\Delta\rho^{\text{[c]}}$ [e·Å <sup>-3</sup> ]                | 0.514 / -0.480 | 0.107 / -0.097 |

[a]  $R_1 = \Sigma||F_o| - |F_c||/|F_o|$ . [b]  $wR_2 = [\Sigma w(F_o^2 - F_c^2)^2 / \Sigma w(F_o^2)^2]^{1/2}$ . [c] Maximum and minimum residual electron density.

**Table S2.** Crystal data and structure refinements for **II**.

|                                                   | 293 K                                                                         | 403 K                                                                         |
|---------------------------------------------------|-------------------------------------------------------------------------------|-------------------------------------------------------------------------------|
| Formula                                           | C <sub>7</sub> H <sub>16</sub> N <sub>3</sub> O <sub>12</sub> Re <sub>3</sub> | C <sub>7</sub> H <sub>16</sub> N <sub>3</sub> O <sub>12</sub> Re <sub>3</sub> |
| $M_w$                                             | 892.86                                                                        | 892.86                                                                        |
| Crystal system                                    | monoclinic                                                                    | cubic                                                                         |
| Space group                                       | $P2_1/c$                                                                      | $Pm\bar{3}m$                                                                  |
| $a$ [Å]                                           | 10.3825(8)                                                                    | 7.699(4)                                                                      |
| $b$ [Å]                                           | 11.2230(5)                                                                    | 7.699(4)                                                                      |
| $c$ [Å]                                           | 15.1415(9)                                                                    | 7.699(4)                                                                      |
| $\alpha$ [°]                                      | 90                                                                            | 90                                                                            |
| $\beta$ [°]                                       | 90.205(6)                                                                     | 90                                                                            |
| $\gamma$ [°]                                      | 90                                                                            | 90                                                                            |
| $V$ [Å <sup>3</sup> ]                             | 1764.32(19)                                                                   | 456.4(7)                                                                      |
| $Z$                                               | 4                                                                             | 1                                                                             |
| $D_{\text{calc}} / \text{g} \cdot \text{cm}^{-3}$ | 3.361                                                                         | 3.088                                                                         |
| $\mu$ [mm <sup>-1</sup> ]                         | 20.595                                                                        | 19.893                                                                        |

|                                                               |                |                |
|---------------------------------------------------------------|----------------|----------------|
| Reflections collected unique                                  | 12840 / 4043   | 1677 / 139     |
| $R_{\text{int}}$                                              | 0.0634         | 0.0500         |
| $R_1^{[\text{a}]}$ , $wR_2^{[\text{b}]}$ ( $I > 2\sigma(I)$ ) | 0.0506, 0.1161 | 0.0512, 0.1350 |
| $R_1^{[\text{a}]}$ , $wR_2^{[\text{b}]}$ (all data)           | 0.0581, 0.1212 | 0.0531, 0.1362 |
| GOF                                                           | 1.155          | 1.342          |
| $\Delta\rho^{[\text{c}]}$ [ $\text{e}\cdot\text{\AA}^{-3}$ ]  | 2.003 / -2.617 | 0.987 / -0.800 |

---

[a]  $R_1 = \Sigma||F_o|-|F_c||/|F_o|$ . [b]  $wR_2 = [\Sigma w(F_o^2 - F_c^2)^2 / \Sigma w(F_o^2)^2]^{1/2}$ . [c] Maximum and minimum residual electron density.
